# Supplementary material
Source: PubMed Central journal article supplement (PMC9197991)
Supplement: NIHMS1800702-supplement-SI_Material.pdf [file NIHMS1800702-supplement-SI_Material.pdf]

## Supplementary information

### **Pursuing totipotency: authentic totipotent stem cells in culture**

Vikas Malik and Jianlong Wang

#### **Supplementary References**

1. Ohinata, Y. et al. (2022) Establishment of mouse stem cells that can recapitulate the developmental potential of primitive endoderm. *Science* 375 (6580), 574-578.
2. Kime, C. et al. (2019) Induced 2C Expression and Implantation-Competent Blastocyst-like Cysts from Primed Pluripotent Stem Cells. *Stem Cell Reports* 13 (3), 485-498.
3. Chen, Z. and Zhang, Y. (2019) Loss of DUX causes minor defects in zygotic genome activation and is compatible with mouse development. *Nat Genet* 51 (6), 947-951.
4. De Iaco, A. et al. (2017) DUX-family transcription factors regulate zygotic genome activation in placental mammals. *Nat Genet* 49 (6), 941-945.
5. Hendrickson, P.G. et al. (2017) Conserved roles of mouse DUX and human DUX4 in activating cleavage-stage genes and MERVL/HERVL retrotransposons. *Nat Genet* 49 (6), 925-934.
